# Supplementary material for: Prediction of microbe-drug associations using a CNN-Bernoulli random forest model
Source: PeerJ journal article supplement (doi:10.7717/peerj.19637), 2025-08-05

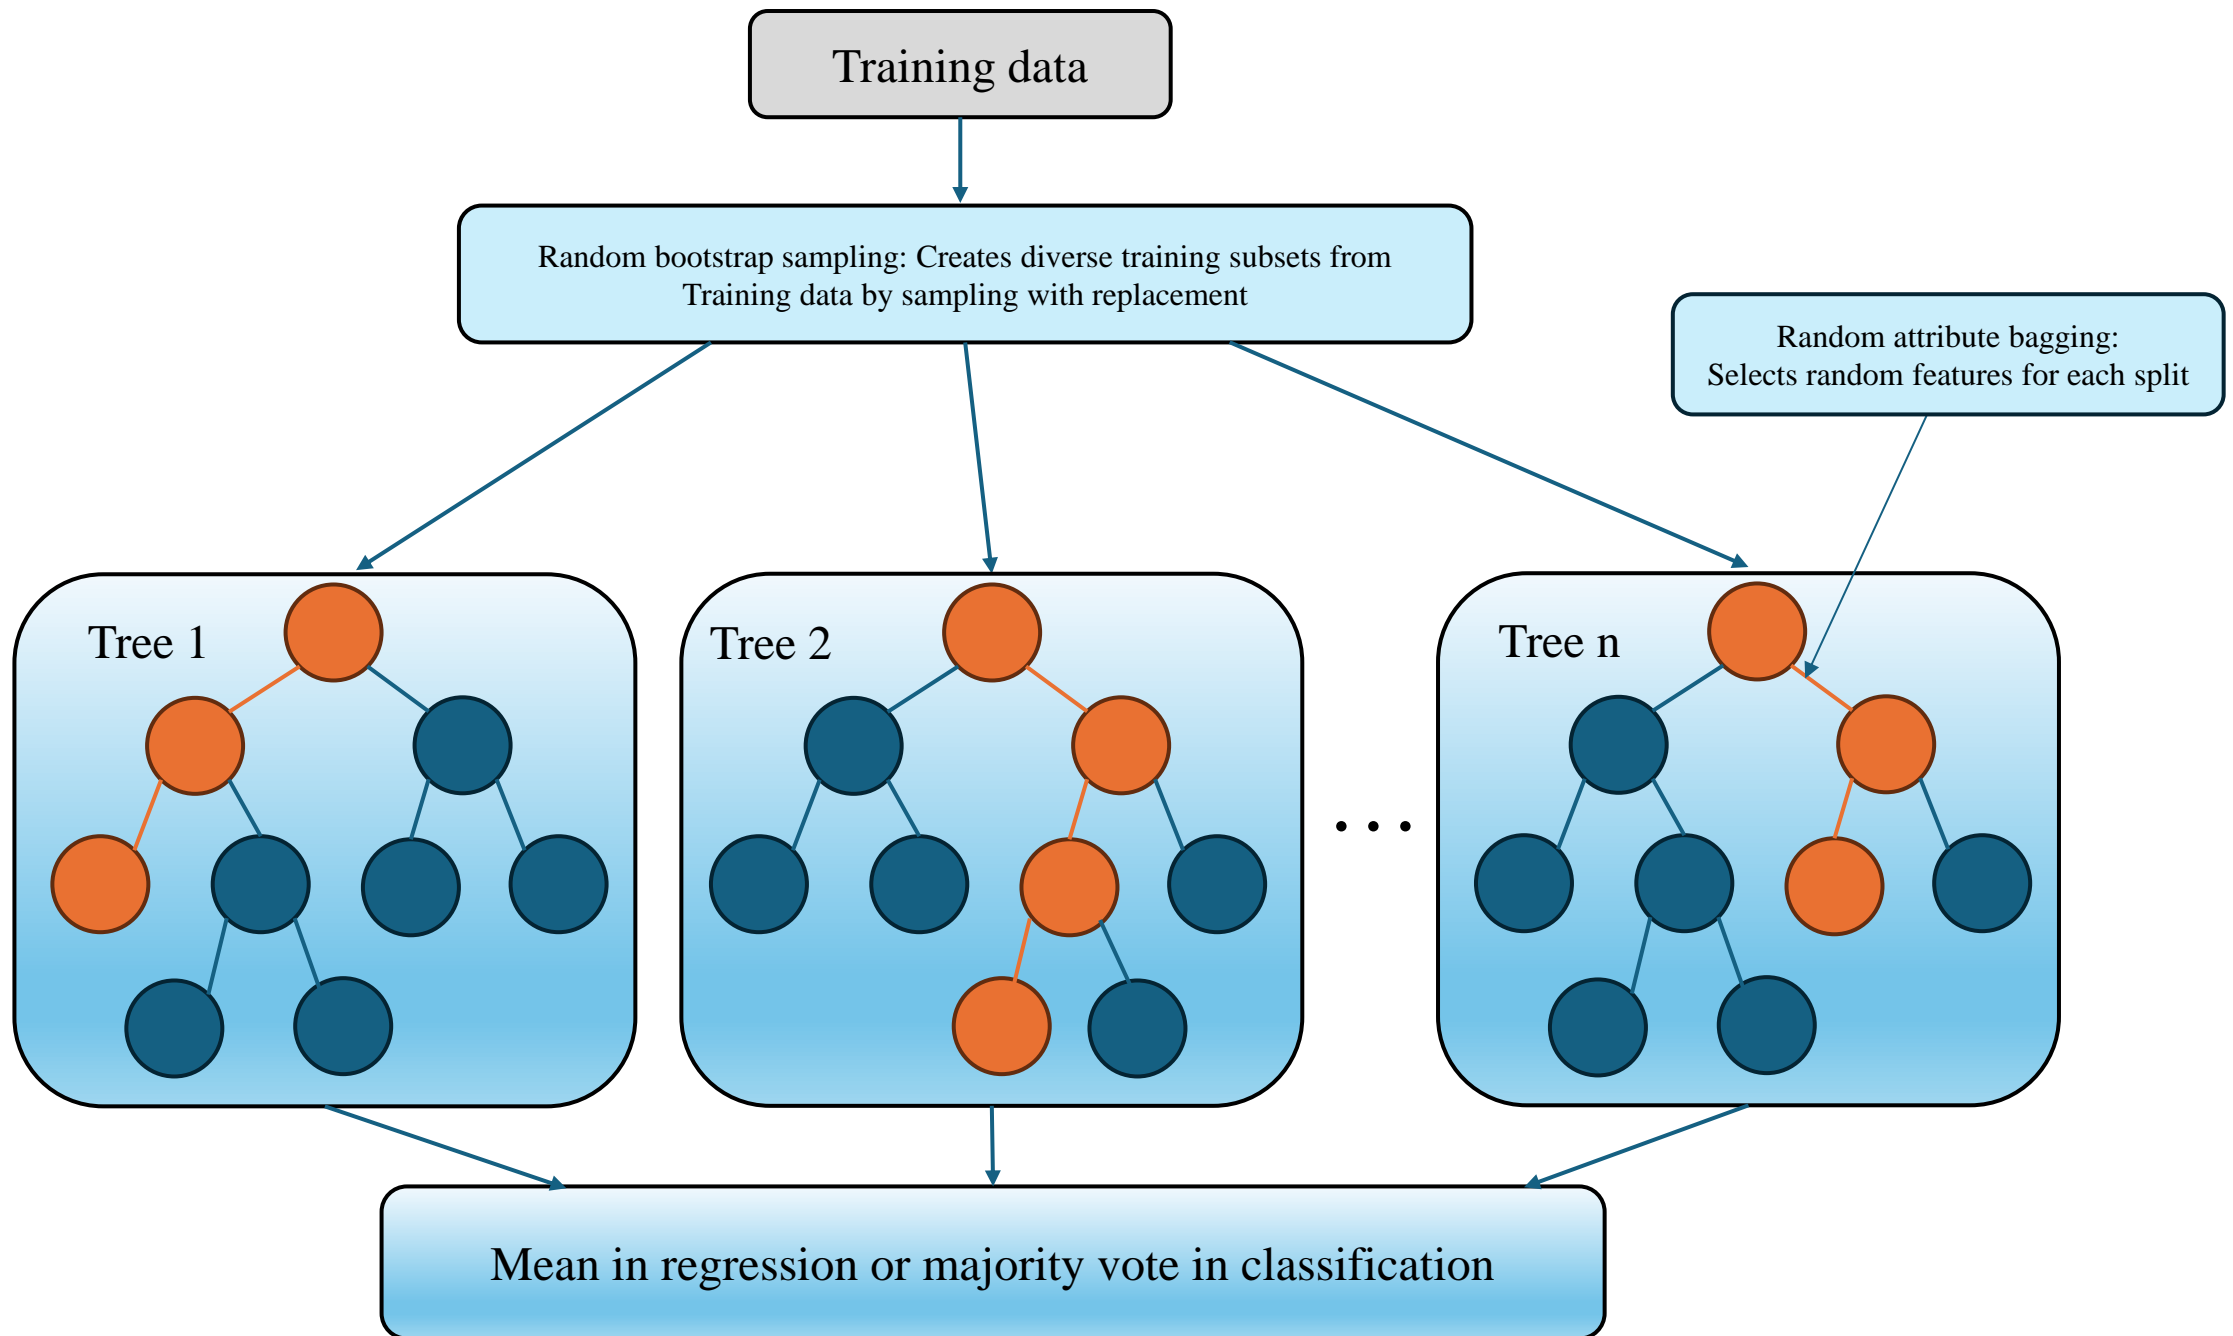

Supplement: Figure_S1StaffSLW.pdf [file Figure_S1StaffSLW.pdf]
