# Supplementary material for: Prediction of microbe-drug associations using a CNN-Bernoulli random forest model
Source: PeerJ journal article supplement (doi:10.7717/peerj.19637), 2025-08-05
Supplement: Supplementary_material_1.zip [file Supplementary_material_1.zip]

## Sheet: microbe sequence similarity
1	0.059	0.028	0.024	0	0.025	0.075	0.018	0.025	0.056	0.023	0.042	0.026	0	0.033	0	0	0.009	0.045	0.059	0.032	0.04	0	0.039	0.047	0.041	0.033	0	0.028	0.017	0.022	0.028	0.014	0.068	0.029	0	0.057	0	0	0.045	0	0	0.029	0.112	0	0.034	0.034	0.041	0	0.027
0.059	1	0.068	0.045	0	0.049	0.143	0.033	0.054	0.108	0.054	0.054	0.057	0	0.193	0	0	0.021	0.057	0.109	0.05	0.058	0	0.083	0.088	0.071	0.056	0	0.053	0.039	0.055	0.061	0.048	0.12	0.028	0	0.109	0	0	0.077	0	0	0.056	0.052	0	0.075	0.075	0.049	0	0.07
0.028	0.068	1	0.028	0	0.023	0.071	0.016	0.034	0.059	0.028	0.034	0.029	0	0.038	0	0	0.011	0.027	0.061	0.023	0.027	0	0.037	0.036	0.037	0.023	0	0.025	0.022	0.03	0.04	0.075	0.066	0.02	0	0.05	0	0	0.034	0	0	0.034	0.035	0	0.04	0.04	0.025	0	0.034
0.024	0.045	0.028	1	0	0.023	0.101	0.029	0.02	0.042	0.027	0.047	0.032	0	0.079	0	0	0.015	0.023	0.046	0.024	0.016	0	0.044	0.041	0.038	0.024	0	0.021	0.022	0.021	0.017	0.044	0.044	0.007	0	0.047	0	0	0.038	0	0	0.026	0.012	0	0.039	0.039	0.024	0	0.039
0	0	0	0	1	0	0	0	0	0	0	0	0	0	0	0	0	0	0	0	0	0	0	0	0	0	0	0	0	0	0	0	0	0	0	0	0	0	0	0	0	0	0	0	0	0	0	0	0	0
0.025	0.049	0.023	0.023	0	1	0.053	0.032	0.051	0.052	0.055	0.026	0.056	0	0.042	0	0	0.03	0.127	0.063	0.131	0.064	0	0.068	0.078	0.065	0.117	0	0.054	0.051	0.048	0.051	0.02	0.055	0.036	0	0.065	0	0	0.069	0	0	0.055	0.018	0	0.061	0.061	0.101	0	0.059
0.075	0.143	0.071	0.101	0	0.053	1	0.033	0.054	0.105	0.055	0.056	0.055	0	0.079	0	0	0.019	0.07	0.104	0.063	0.066	0	0.092	0.097	0.08	0.057	0	0.058	0.034	0.049	0.059	0.042	0.116	0.036	0	0.119	0	0	0.086	0	0	0.061	0.064	0	0.082	0.082	0.064	0	0.066
0.018	0.033	0.016	0.029	0	0.032	0.033	1	0.045	0.043	0.065	0.025	0.065	0	0.025	0	0	0.042	0.034	0.047	0.037	0.032	0	0.049	0.045	0.048	0.04	0	0.058	0.068	0.045	0.045	0.027	0.042	0.012	0	0.052	0	0	0.045	0	0	0.045	0.011	0	0.042	0.042	0.03	0	0.047
0.025	0.054	0.034	0.02	0	0.051	0.054	0.045	1	0.068	0.074	0.025	0.074	0	0.048	0	0	0.027	0.056	0.071	0.056	0.058	0	0.062	0.067	0.063	0.059	0	0.075	0.05	0.15	0.189	0.032	0.063	0.026	0	0.063	0	0	0.056	0	0	0.148	0.024	0	0.069	0.069	0.043	0	0.055
0.056	0.108	0.059	0.042	0	0.052	0.105	0.043	0.068	1	0.064	0.047	0.067	0	0.08	0	0	0.026	0.074	0.594	0.069	0.062	0	0.113	0.111	0.112	0.066	0	0.07	0.043	0.067	0.077	0.039	0.509	0.031	0	0.133	0	0	0.095	0	0	0.068	0.046	0	0.095	0.095	0.064	0	0.078
0.023	0.054	0.028	0.027	0	0.055	0.055	0.065	0.074	0.064	1	0.03	0.243	0	0.036	0	0	0.038	0.061	0.069	0.058	0.062	0	0.071	0.071	0.064	0.055	0	0.162	0.07	0.067	0.084	0.022	0.062	0.029	0	0.076	0	0	0.06	0	0	0.074	0.023	0	0.069	0.069	0.056	0	0.061
0.042	0.054	0.034	0.047	0	0.026	0.056	0.025	0.025	0.047	0.03	1	0.031	0	0.056	0	0	0.026	0.027	0.045	0.027	0.02	0	0.051	0.049	0.049	0.033	0	0.025	0.03	0.022	0.022	0.061	0.048	0.008	0	0.044	0	0	0.051	0	0	0.03	0.02	0	0.038	0.038	0.025	0	0.046
0.026	0.057	0.029	0.032	0	0.056	0.055	0.065	0.074	0.067	0.243	0.031	1	0	0.04	0	0	0.042	0.054	0.073	0.056	0.054	0	0.072	0.066	0.063	0.051	0	0.143	0.064	0.081	0.087	0.03	0.064	0.02	0	0.073	0	0	0.066	0	0	0.076	0.021	0	0.073	0.073	0.045	0	0.065
0	0	0	0	0	0	0	0	0	0	0	0	0	1	0	0	0	0	0	0	0	0	0	0	0	0	0	0	0	0	0	0	0	0	0	0	0	0	0	0	0	0	0	0	0	0	0	0	0	0
0.033	0.193	0.038	0.079	0	0.042	0.079	0.025	0.048	0.08	0.036	0.056	0.04	0	1	0	0	0.021	0.043	0.085	0.041	0.027	0	0.083	0.067	0.062	0.038	0	0.032	0.029	0.038	0.034	0.072	0.067	0.01	0	0.071	0	0	0.068	0	0	0.045	0.018	0	0.071	0.071	0.039	0	0.055
0	0	0	0	0	0	0	0	0	0	0	0	0	0	0	1	0	0	0	0	0	0	0	0	0	0	0	0	0	0	0	0	0	0	0	0	0	0	0	0	0	0	0	0	0	0	0	0	0	0
0	0	0	0	0	0	0	0	0	0	0	0	0	0	0	0	1	0	0	0	0	0	0	0	0	0	0	0	0	0	0	0	0	0	0	0	0	0	0	0	0	0	0	0	0	0	0	0	0	0
0.009	0.021	0.011	0.015	0	0.03	0.019	0.042	0.027	0.026	0.038	0.026	0.042	0	0.021	0	0	1	0.023	0.027	0.029	0.019	0	0.025	0.029	0.029	0.028	0	0.032	0.093	0.029	0.023	0.014	0.025	0.006	0	0.023	0	0	0.023	0	0	0.027	0.007	0	0.026	0.026	0.022	0	0.025
0.045	0.057	0.027	0.023	0	0.127	0.07	0.034	0.056	0.074	0.061	0.027	0.054	0	0.043	0	0	0.023	1	0.078	0.172	0.104	0	0.078	0.092	0.085	0.148	0	0.072	0.038	0.05	0.065	0.014	0.079	0.076	0	0.093	0	0	0.084	0	0	0.059	0.029	0	0.073	0.073	0.181	0	0.054
0.059	0.109	0.061	0.046	0	0.063	0.104	0.047	0.071	0.594	0.069	0.045	0.073	0	0.085	0	0	0.027	0.078	1	0.076	0.064	0	0.117	0.112	0.113	0.065	0	0.076	0.046	0.072	0.081	0.045	0.527	0.032	0	0.142	0	0	0.101	0	0	0.074	0.046	0	0.105	0.105	0.068	0	0.079
0.032	0.05	0.023	0.024	0	0.131	0.063	0.037	0.056	0.069	0.058	0.027	0.056	0	0.041	0	0	0.029	0.172	0.076	1	0.084	0	0.082	0.087	0.072	0.12	0	0.064	0.038	0.053	0.058	0.018	0.073	0.05	0	0.085	0	0	0.072	0	0	0.052	0.022	0	0.071	0.071	0.137	0	0.05
0.04	0.058	0.027	0.016	0	0.064	0.066	0.032	0.058	0.062	0.062	0.02	0.054	0	0.027	0	0	0.019	0.104	0.064	0.084	1	0	0.058	0.08	0.064	0.091	0	0.068	0.032	0.053	0.082	0.013	0.07	0.085	0	0.08	0	0	0.06	0	0	0.06	0.038	0	0.064	0.064	0.095	0	0.045
0	0	0	0	0	0	0	0	0	0	0	0	0	0	0	0	0	0	0	0	0	0	1	0	0	0	0	0	0	0	0	0	0	0	0	0	0	0	0	0	0	0	0	0	0	0	0	0	0	0
0.039	0.083	0.037	0.044	0	0.068	0.092	0.049	0.062	0.113	0.071	0.051	0.072	0	0.083	0	0	0.025	0.078	0.117	0.082	0.058	0	1	0.144	0.135	0.079	0	0.074	0.05	0.054	0.069	0.034	0.108	0.031	0	0.129	0	0	0.121	0	0	0.067	0.031	0	0.13	0.13	0.069	0	0.107
0.047	0.088	0.036	0.041	0	0.078	0.097	0.045	0.067	0.111	0.071	0.049	0.066	0	0.067	0	0	0.029	0.092	0.112	0.087	0.08	0	0.144	1	0.152	0.078	0	0.082	0.043	0.054	0.078	0.025	0.117	0.045	0	0.153	0	0	0.138	0	0	0.076	0.037	0	0.122	0.122	0.083	0	0.099
0.041	0.071	0.037	0.038	0	0.065	0.08	0.048	0.063	0.112	0.064	0.049	0.063	0	0.062	0	0	0.029	0.085	0.113	0.072	0.064	0	0.135	0.152	1	0.073	0	0.07	0.048	0.057	0.077	0.035	0.119	0.033	0	0.122	0	0	0.134	0	0	0.071	0.027	0	0.115	0.115	0.069	0	0.096
0.033	0.056	0.023	0.024	0	0.117	0.057	0.04	0.059	0.066	0.055	0.033	0.051	0	0.038	0	0	0.028	0.148	0.065	0.12	0.091	0	0.079	0.078	0.073	1	0	0.064	0.045	0.05	0.063	0.015	0.066	0.046	0	0.075	0	0	0.077	0	0	0.058	0.021	0	0.066	0.066	0.115	0	0.059
0	0	0	0	0	0	0	0	0	0	0	0	0	0	0	0	0	0	0	0	0	0	0	0	0	0	0	1	0	0	0	0	0	0	0	0	0	0	0	0	0	0	0	0	0	0	0	0	0	0
0.028	0.053	0.025	0.021	0	0.054	0.058	0.058	0.075	0.07	0.162	0.025	0.143	0	0.032	0	0	0.032	0.072	0.076	0.064	0.068	0	0.074	0.082	0.07	0.064	0	1	0.068	0.067	0.093	0.02	0.069	0.033	0	0.074	0	0	0.068	0	0	0.08	0.025	0	0.068	0.068	0.063	0	0.058
0.017	0.039	0.022	0.022	0	0.051	0.034	0.068	0.05	0.043	0.07	0.03	0.064	0	0.029	0	0	0.093	0.038	0.046	0.038	0.032	0	0.05	0.043	0.048	0.045	0	0.068	1	0.046	0.05	0.022	0.04	0.015	0	0.044	0	0	0.04	0	0	0.053	0.013	0	0.048	0.048	0.036	0	0.043
0.022	0.055	0.03	0.021	0	0.048	0.049	0.045	0.15	0.067	0.067	0.022	0.081	0	0.038	0	0	0.029	0.05	0.072	0.053	0.053	0	0.054	0.054	0.057	0.05	0	0.067	0.046	1	0.258	0.032	0.061	0.021	0	0.054	0	0	0.054	0	0	0.141	0.02	0	0.061	0.061	0.044	0	0.053
0.028	0.061	0.04	0.017	0	0.051	0.059	0.045	0.189	0.077	0.084	0.022	0.087	0	0.034	0	0	0.023	0.065	0.081	0.058	0.082	0	0.069	0.078	0.077	0.063	0	0.093	0.05	0.258	1	0.027	0.074	0.042	0	0.072	0	0	0.06	0	0	0.157	0.035	0	0.078	0.078	0.05	0	0.062
0.014	0.048	0.075	0.044	0	0.02	0.042	0.027	0.032	0.039	0.022	0.061	0.03	0	0.072	0	0	0.014	0.014	0.045	0.018	0.013	0	0.034	0.025	0.035	0.015	0	0.02	0.022	0.032	0.027	1	0.037	0.004	0	0.041	0	0	0.029	0	0	0.029	0.012	0	0.037	0.037	0.015	0	0.034
0.068	0.12	0.066	0.044	0	0.055	0.116	0.042	0.063	0.509	0.062	0.048	0.064	0	0.067	0	0	0.025	0.079	0.527	0.073	0.07	0	0.108	0.117	0.119	0.066	0	0.069	0.04	0.061	0.074	0.037	1	0.041	0	0.133	0	0	0.097	0	0	0.065	0.055	0	0.095	0.095	0.069	0	0.076
0.029	0.028	0.02	0.007	0	0.036	0.036	0.012	0.026	0.031	0.029	0.008	0.02	0	0.01	0	0	0.006	0.076	0.032	0.05	0.085	0	0.031	0.045	0.033	0.046	0	0.033	0.015	0.021	0.042	0.004	0.041	1	0	0.045	0	0	0.031	0	0	0.029	0.045	0	0.03	0.03	0.085	0	0.022
0	0	0	0	0	0	0	0	0	0	0	0	0	0	0	0	0	0	0	0	0	0	0	0	0	0	0	0	0	0	0	0	0	0	0	1	0	0	0	0	0	0	0	0	0	0	0	0	0	0
0.057	0.109	0.05	0.047	0	0.065	0.119	0.052	0.063	0.133	0.076	0.044	0.073	0	0.071	0	0	0.023	0.093	0.142	0.085	0.08	0	0.129	0.153	0.122	0.075	0	0.074	0.044	0.054	0.072	0.041	0.133	0.045	0	1	0	0	0.12	0	0	0.07	0.044	0	0.116	0.116	0.083	0	0.076
0	0	0	0	0	0	0	0	0	0	0	0	0	0	0	0	0	0	0	0	0	0	0	0	0	0	0	0	0	0	0	0	0	0	0	0	0	1	0	0	0	0	0	0	0	0	0	0	0	0
0	0	0	0	0	0	0	0	0	0	0	0	0	0	0	0	0	0	0	0	0	0	0	0	0	0	0	0	0	0	0	0	0	0	0	0	0	0	1	0	0	0	0	0	0	0	0	0	0	0
0.045	0.077	0.034	0.038	0	0.069	0.086	0.045	0.056	0.095	0.06	0.051	0.066	0	0.068	0	0	0.023	0.084	0.101	0.072	0.06	0	0.121	0.138	0.134	0.077	0	0.068	0.04	0.054	0.06	0.029	0.097	0.031	0	0.12	0	0	1	0	0	0.062	0.027	0	0.125	0.125	0.071	0	0.094
0	0	0	0	0	0	0	0	0	0	0	0	0	0	0	0	0	0	0	0	0	0	0	0	0	0	0	0	0	0	0	0	0	0	0	0	0	0	0	0	1	0	0	0	0	0	0	0	0	0
0	0	0	0	0	0	0	0	0	0	0	0	0	0	0	0	0	0	0	0	0	0	0	0	0	0	0	0	0	0	0	0	0	0	0	0	0	0	0	0	0	1	0	0	0	0	0	0	0	0
0.029	0.056	0.034	0.026	0	0.055	0.061	0.045	0.148	0.068	0.074	0.03	0.076	0	0.045	0	0	0.027	0.059	0.074	0.052	0.06	0	0.067	0.076	0.071	0.058	0	0.08	0.053	0.141	0.157	0.029	0.065	0.029	0	0.07	0	0	0.062	0	0	1	0.026	0	0.071	0.071	0.049	0	0.058
0.112	0.052	0.035	0.012	0	0.018	0.064	0.011	0.024	0.046	0.023	0.02	0.021	0	0.018	0	0	0.007	0.029	0.046	0.022	0.038	0	0.031	0.037	0.027	0.021	0	0.025	0.013	0.02	0.035	0.012	0.055	0.045	0	0.044	0	0	0.027	0	0	0.026	1	0	0.028	0.028	0.028	0	0.021
0	0	0	0	0	0	0	0	0	0	0	0	0	0	0	0	0	0	0	0	0	0	0	0	0	0	0	0	0	0	0	0	0	0	0	0	0	0	0	0	0	0	0	0	1	0	0	0	0	0
0.034	0.075	0.04	0.039	0	0.061	0.082	0.042	0.069	0.095	0.069	0.038	0.073	0	0.071	0	0	0.026	0.073	0.105	0.071	0.064	0	0.13	0.122	0.115	0.066	0	0.068	0.048	0.061	0.078	0.037	0.095	0.03	0	0.116	0	0	0.125	0	0	0.071	0.028	0	1	0	0.061	0	0.099
0.034	0.075	0.04	0.039	0	0.061	0.082	0.042	0.069	0.095	0.069	0.038	0.073	0	0.071	0	0	0.026	0.073	0.105	0.071	0.064	0	0.13	0.122	0.115	0.066	0	0.068	0.048	0.061	0.078	0.037	0.095	0.03	0	0.116	0	0	0.125	0	0	0.071	0.028	0	0	1	0.061	0	0.099
0.041	0.049	0.025	0.024	0	0.101	0.064	0.03	0.043	0.064	0.056	0.025	0.045	0	0.039	0	0	0.022	0.181	0.068	0.137	0.095	0	0.069	0.083	0.069	0.115	0	0.063	0.036	0.044	0.05	0.015	0.069	0.085	0	0.083	0	0	0.071	0	0	0.049	0.028	0	0.061	0.061	1	0	0.052
0	0	0	0	0	0	0	0	0	0	0	0	0	0	0	0	0	0	0	0	0	0	0	0	0	0	0	0	0	0	0	0	0	0	0	0	0	0	0	0	0	0	0	0	0	0	0	0	1	0
0.027	0.07	0.034	0.039	0	0.059	0.066	0.047	0.055	0.078	0.061	0.046	0.065	0	0.055	0	0	0.025	0.054	0.079	0.05	0.045	0	0.107	0.099	0.096	0.059	0	0.058	0.043	0.053	0.062	0.034	0.076	0.022	0	0.076	0	0	0.094	0	0	0.058	0.021	0	0.099	0.099	0.052	0	1
0.021	0.035	0.019	0.026	0	0.047	0.039	0.066	0.039	0.039	0.056	0.028	0.054	0	0.035	0	0	0.098	0.042	0.039	0.043	0.023	0	0.041	0.039	0.042	0.041	0	0.055	0.125	0.04	0.035	0.024	0.036	0.011	0	0.038	0	0	0.04	0	0	0.042	0.012	0	0.04	0.04	0.036	0	0.043
0	0	0	0	0	0	0	0	0	0	0	0	0	0	0	0	0	0	0	0	0	0	0	0	0	0	0	0	0	0	0	0	0	0	0	0	0	0	0	0	0	0	0	0	0	0	0	0	0	0
0.035	0.053	0.028	0.017	0	0.068	0.066	0.032	0.06	0.059	0.06	0.02	0.05	0	0.025	0	0	0.016	0.107	0.059	0.083	0.218	0	0.063	0.078	0.064	0.085	0	0.064	0.033	0.051	0.081	0.014	0.066	0.082	0	0.08	0	0	0.061	0	0	0.052	0.037	0	0.062	0.062	0.088	0	0.048
0.025	0.036	0.021	0.023	0	0.043	0.038	0.076	0.043	0.046	0.067	0.028	0.066	0	0.033	0	0	0.096	0.043	0.05	0.044	0.035	0	0.049	0.05	0.051	0.047	0	0.068	0.125	0.043	0.044	0.026	0.044	0.014	0	0.051	0	0	0.05	0	0	0.051	0.014	0	0.056	0.056	0.041	0	0.049
0	0	0	0	0	0	0	0	0	0	0	0	0	0	0	0	0	0	0	0	0	0	0	0	0	0	0	0	0	0	0	0	0	0	0	0	0	0	0	0	0	0	0	0	0	0	0	0	0	0
0.029	0.049	0.034	0.014	0	0.037	0.052	0.044	0.06	0.056	0.082	0.016	0.074	0	0.024	0	0	0.033	0.057	0.058	0.042	0.075	0	0.053	0.061	0.048	0.05	0	0.091	0.076	0.051	0.094	0.013	0.058	0.059	0	0.061	0	0	0.044	0	0	0.057	0.038	0	0.055	0.055	0.048	0	0.045
0.031	0.059	0.034	0.017	0	0.054	0.058	0.04	0.176	0.078	0.077	0.025	0.076	0	0.038	0	0	0.02	0.067	0.078	0.06	0.076	0	0.069	0.077	0.068	0.058	0	0.086	0.048	0.214	0.358	0.024	0.076	0.04	0	0.076	0	0	0.061	0	0	0.156	0.033	0	0.073	0.073	0.056	0	0.061
0.04	0.087	0.044	0.046	0	0.075	0.096	0.049	0.061	0.123	0.059	0.052	0.063	0	0.074	0	0	0.032	0.08	0.126	0.079	0.065	0	0.133	0.139	0.129	0.076	0	0.067	0.045	0.065	0.075	0.036	0.115	0.03	0	0.135	0	0	0.129	0	0	0.078	0.033	0	0.109	0.109	0.067	0	0.103
0	0	0	0	0	0	0	0	0	0	0	0	0	0	0	0	0	0	0	0	0	0	0	0	0	0	0	0	0	0	0	0	0	0	0	0	0	0	0	0	0	0	0	0	0	0	0	0	0	0
0.011	0.02	0.007	0.007	0	0.028	0.021	0.012	0.019	0.022	0.018	0.008	0.013	0	0.012	0	0	0.004	0.03	0.022	0.026	0.046	0	0.023	0.024	0.02	0.03	0	0.02	0.012	0.018	0.021	0.007	0.019	0.015	0	0.024	0	0	0.018	0	0	0.018	0.009	0	0.023	0.023	0.021	0	0.014
0.026	0.054	0.029	0.022	0	0.053	0.049	0.167	0.068	0.066	0.093	0.028	0.103	0	0.037	0	0	0.049	0.056	0.07	0.053	0.054	0	0.067	0.065	0.062	0.056	0	0.1	0.086	0.065	0.08	0.024	0.066	0.023	0	0.068	0	0	0.057	0	0	0.067	0.02	0	0.072	0.072	0.047	0	0.06
0.038	0.423	0.042	0.03	0	0.03	0.079	0.026	0.027	0.063	0.029	0.037	0.031	0	0.001	0	0	0.019	0.029	0.06	0.025	0.032	0	0.041	0.045	0.034	0.033	0	0.029	0.025	0.037	0.031	0.018	0.07	0.014	0	0.053	0	0	0.043	0	0	0.031	0.03	0	0.036	0.036	0.026	0	0.04
0	0	0	0	0	0	0	0	0	0	0	0	0	0	0	0	0	0	0	0	0	0	0	0	0	0	0	0	0	0	0	0	0	0	0	0	0	0	0	0	0	0	0	0	0	0	0	0	0	0
0	0	0	0	0	0	0	0	0	0	0	0	0	0	0	0	0	0	0	0	0	0	0	0	0	0	0	0	0	0	0	0	0	0	0	0	0	0	0	0	0	0	0	0	0	0	0	0	0	0
0.042	0.054	0.027	0.018	0	0.1	0.071	0.033	0.057	0.068	0.058	0.027	0.048	0	0.032	0	0	0.019	0.174	0.069	0.125	0.128	0	0.068	0.094	0.076	0.135	0	0.071	0.041	0.048	0.074	0.013	0.076	0.091	0	0.089	0	0	0.075	0	0	0.058	0.036	0	0.063	0.063	0.144	0	0.049
0.037	0.221	0.04	0.063	0	0.047	0.093	0.023	0.048	0.08	0.038	0.065	0.041	0	0.649	0	0	0.021	0.048	0.084	0.05	0.033	0	0.083	0.071	0.065	0.042	0	0.034	0.031	0.033	0.035	0.065	0.073	0.012	0	0.079	0	0	0.07	0	0	0.045	0.021	0	0.073	0.073	0.039	0	0.06
0.037	0.058	0.028	0.022	0	0.13	0.069	0.041	0.062	0.076	0.067	0.032	0.061	0	0.035	0	0	0.023	0.171	0.077	0.14	0.113	0	0.078	0.099	0.082	0.336	0	0.075	0.043	0.057	0.076	0.018	0.078	0.064	0	0.09	0	0	0.082	0	0	0.067	0.028	0	0.075	0.075	0.121	0	0.059
0.028	0.047	0.033	0.016	0	0.04	0.053	0.045	0.063	0.058	0.079	0.014	0.07	0	0.021	0	0	0.032	0.058	0.06	0.047	0.072	0	0.051	0.064	0.05	0.051	0	0.088	0.07	0.051	0.09	0.016	0.063	0.067	0	0.063	0	0	0.048	0	0	0.061	0.036	0	0.054	0.054	0.052	0	0.042
0	0	0	0	0	0	0	0	0	0	0	0	0	0	0	0	0	0	0	0	0	0	0	0	0	0	0	0	0	0	0	0	0	0	0	0	0	0	0	0	0	0	0	0	0	0	0	0	0	0
0.052	0.11	0.044	0.043	0	0.059	0.106	0.053	0.071	0.129	0.077	0.051	0.078	0	0.079	0	0	0.024	0.09	0.133	0.082	0.076	0	0.135	0.163	0.126	0.08	0	0.084	0.042	0.066	0.083	0.043	0.128	0.038	0	0.153	0	0	0.129	0	0	0.077	0.039	0	0.123	0.123	0.078	0	0.095
0	0	0	0	0	0	0	0	0	0	0	0	0	0	0	0	0	0	0	0	0	0	0	0	0	0	0	0	0	0	0	0	0	0	0	0	0	0	0	0	0	0	0	0	0	0	0	0	0	0
0.034	0.037	0.021	0.026	0	0.085	0.054	0.027	0.032	0.047	0.043	0.029	0.039	0	0.028	0	0	0.021	0.118	0.052	0.108	0.056	0	0.051	0.058	0.057	0.082	0	0.049	0.031	0.031	0.031	0.022	0.05	0.047	0	0.06	0	0	0.061	0	0	0.042	0.019	0	0.046	0.046	0.157	0	0.041
0	0	0	0	0	0	0	0	0	0	0	0	0	0	0	0	0	0	0	0	0	0	0	0	0	0	0	0	0	0	0	0	0	0	0	0	0	0	0	0	0	0	0	0	0	0	0	0	0	0
0.048	0.083	0.04	0.036	0	0.066	0.097	0.039	0.075	0.12	0.075	0.032	0.071	0	0.054	0	0	0.025	0.094	0.124	0.08	0.088	0	0.119	0.148	0.137	0.08	0	0.081	0.043	0.071	0.099	0.027	0.123	0.051	0	0.14	0	0	0.12	0	0	0.08	0.042	0	0.124	0.124	0.081	0	0.093
0.057	0.1	0.049	0.038	0	0.072	0.11	0.041	0.07	0.125	0.07	0.049	0.073	0	0.066	0	0	0.029	0.091	0.134	0.085	0.082	0	0.145	0.16	0.137	0.077	0	0.084	0.048	0.065	0.088	0.034	0.136	0.044	0	0.152	0	0	0.126	0	0	0.074	0.045	0	0.114	0.114	0.084	0	0.105
0.057	0.102	0.045	0.037	0	0.067	0.121	0.044	0.069	0.123	0.073	0.044	0.07	0	0.068	0	0	0.022	0.095	0.134	0.083	0.089	0	0.14	0.161	0.131	0.083	0	0.079	0.041	0.065	0.087	0.032	0.134	0.048	0	0.175	0	0	0.123	0	0	0.072	0.046	0	0.13	0.13	0.084	0	0.094
0.07	0.034	0.01	0.028	0	0.024	0.045	0.018	0.017	0.034	0.017	0.072	0.019	0	0.037	0	0	0.015	0.024	0.037	0.025	0.017	0	0.031	0.036	0.035	0.022	0	0.017	0.016	0.024	0.016	0.011	0.039	0.008	0	0.038	0	0	0.039	0	0	0.021	0.028	0	0.025	0.025	0.025	0	0.021
0.041	0.076	0.034	0.044	0	0.061	0.081	0.049	0.062	0.104	0.066	0.048	0.075	0	0.08	0	0	0.024	0.07	0.118	0.07	0.061	0	0.124	0.134	0.14	0.066	0	0.069	0.045	0.06	0.067	0.041	0.102	0.028	0	0.11	0	0	0.133	0	0	0.074	0.027	0	0.124	0.124	0.07	0	0.102
0.014	0.029	0.015	0.024	0	0.026	0.03	0.046	0.029	0.035	0.045	0.019	0.049	0	0.023	0	0	0.072	0.026	0.034	0.022	0.021	0	0.033	0.031	0.029	0.024	0	0.047	0.083	0.031	0.03	0.019	0.032	0.008	0	0.029	0	0	0.024	0	0	0.035	0.008	0	0.026	0.026	0.021	0	0.029
0.041	0.068	0.025	0.037	0	0.063	0.083	0.042	0.058	0.091	0.064	0.04	0.061	0	0.056	0	0	0.025	0.093	0.09	0.08	0.071	0	0.105	0.137	0.126	0.083	0	0.073	0.041	0.057	0.07	0.022	0.094	0.037	0	0.12	0	0	0.121	0	0	0.059	0.027	0	0.093	0.093	0.083	0	0.088
0.031	0.061	0.028	0.029	0	0.053	0.06	0.047	0.046	0.086	0.052	0.046	0.06	0	0.06	0	0	0.027	0.059	0.092	0.061	0.05	0	0.114	0.117	0.119	0.061	0	0.057	0.04	0.05	0.058	0.033	0.081	0.022	0	0.094	0	0	0.106	0	0	0.057	0.02	0	0.117	0.117	0.05	0	0.1
0.03	0.06	0.027	0.028	0	0.051	0.061	0.049	0.045	0.084	0.054	0.045	0.06	0	0.057	0	0	0.026	0.059	0.091	0.06	0.049	0	0.112	0.115	0.119	0.059	0	0.057	0.039	0.048	0.06	0.033	0.081	0.022	0	0.096	0	0	0.106	0	0	0.059	0.02	0	0.119	0.119	0.051	0	0.1
0.028	0.06	0.032	0.021	0	0.056	0.058	0.064	0.077	0.07	0.204	0.026	0.176	0	0.031	0	0	0.032	0.068	0.073	0.06	0.076	0	0.071	0.076	0.07	0.062	0	0.177	0.066	0.068	0.105	0.022	0.072	0.044	0	0.081	0	0	0.064	0	0	0.076	0.028	0	0.078	0.078	0.054	0	0.061
0.024	0.049	0.031	0.021	0	0.052	0.051	0.175	0.075	0.06	0.093	0.026	0.106	0	0.041	0	0	0.065	0.053	0.066	0.052	0.051	0	0.066	0.059	0.061	0.049	0	0.098	0.096	0.064	0.079	0.027	0.061	0.024	0	0.061	0	0	0.054	0	0	0.073	0.019	0	0.063	0.063	0.046	0	0.056
0.042	0.074	0.031	0.042	0	0.072	0.081	0.039	0.058	0.106	0.064	0.056	0.061	0	0.074	0	0	0.034	0.078	0.114	0.069	0.055	0	0.129	0.144	0.116	0.072	0	0.066	0.043	0.059	0.062	0.033	0.099	0.029	0	0.114	0	0	0.13	0	0	0.069	0.026	0	0.12	0.12	0.067	0	0.096
0.014	0.012	0.027	0.002	0	0.003	0.013	0.002	0.006	0.009	0.006	0.002	0.005	0	0.003	0	0	0.001	0.007	0.009	0.005	0.013	0	0.007	0.008	0.007	0.005	0	0.007	0.003	0.005	0.011	0.003	0.012	0.037	0	0.011	0	0	0.006	0	0	0.006	0.046	0	0.007	0.007	0.006	0	0.005
0.016	0.009	0.014	0.001	0	0.003	0.011	0.002	0.005	0.007	0.005	0.002	0.004	0	0.002	0	0	0.001	0.006	0.007	0.004	0.011	0	0.006	0.007	0.006	0.005	0	0.006	0.003	0.004	0.01	0.002	0.009	0.035	0	0.009	0	0	0.005	0	0	0.005	0.046	0	0.006	0.006	0.006	0	0.004
0	0	0	0	0	0	0	0	0	0	0	0	0	0	0	0	0	0	0	0	0	0	0	0	0	0	0	0	0	0	0	0	0	0	0	0	0	0	0	0	0	0	0	0	0	0	0	0	0	0
0.036	0.054	0.024	0.021	0	0.07	0.068	0.029	0.056	0.056	0.055	0.022	0.053	0	0.029	0	0	0.016	0.112	0.059	0.082	0.195	0	0.061	0.081	0.062	0.087	0	0.064	0.033	0.049	0.076	0.012	0.065	0.076	0	0.08	0	0	0.059	0	0	0.058	0.032	0	0.064	0.064	0.09	0	0.046
0	0	0	0	0	0	0	0	0	0	0	0	0	0	0	0	0	0	0	0	0	0	0	0	0	0	0	0	0	0	0	0	0	0	0	0	0	0	0	0	0	0	0	0	0	0	0	0	0	0
0.036	0.042	0.026	0.013	0	0.06	0.052	0.02	0.04	0.049	0.042	0.015	0.033	0	0.017	0	0	0.012	0.119	0.051	0.083	0.104	0	0.047	0.062	0.049	0.076	0	0.047	0.025	0.032	0.053	0.008	0.059	0.239	0	0.065	0	0	0.046	0	0	0.041	0.045	0	0.044	0.044	0.153	0	0.031
0.022	0.033	0.013	0.014	0	0.051	0.034	0.025	0.035	0.034	0.035	0.027	0.032	0	0.032	0	0	0.011	0.059	0.035	0.057	0.067	0	0.039	0.043	0.04	0.056	0	0.033	0.021	0.027	0.031	0.014	0.035	0.021	0	0.041	0	0	0.04	0	0	0.03	0.012	0	0.035	0.035	0.053	0	0.033
0.022	0.031	0.012	0.021	0	0.044	0.033	0.022	0.031	0.032	0.026	0.023	0.031	0	0.029	0	0	0.014	0.056	0.034	0.051	0.067	0	0.039	0.039	0.029	0.05	0	0.035	0.019	0.029	0.028	0.013	0.034	0.021	0	0.034	0	0	0.034	0	0	0.033	0.012	0	0.028	0.028	0.055	0	0.031
0.027	0.047	0.025	0.024	0	0.052	0.054	0.068	0.065	0.067	0.157	0.026	0.141	0	0.03	0	0	0.036	0.064	0.071	0.055	0.061	0	0.075	0.077	0.068	0.057	0	0.337	0.074	0.062	0.078	0.023	0.064	0.03	0	0.076	0	0	0.064	0	0	0.077	0.021	0	0.071	0.071	0.062	0	0.058
0.038	0.283	0.047	0.064	0	0.044	0.096	0.027	0.048	0.08	0.041	0.065	0.046	0	0.49	0	0	0.022	0.045	0.085	0.046	0.034	0	0.081	0.076	0.066	0.044	0	0.04	0.031	0.041	0.044	0.066	0.083	0.013	0	0.082	0	0	0.072	0	0	0.048	0.023	0	0.073	0.073	0.042	0	0.06
0.022	0.05	0.025	0.019	0	0.049	0.051	0.097	0.064	0.058	0.108	0.03	0.103	0	0.039	0	0	0.057	0.065	0.068	0.056	0.052	0	0.065	0.064	0.061	0.05	0	0.116	0.091	0.064	0.072	0.032	0.056	0.023	0	0.064	0	0	0.055	0	0	0.07	0.018	0	0.059	0.059	0.052	0	0.056
0.026	0.058	0.038	0.019	0	0.053	0.056	0.046	0.297	0.074	0.089	0.021	0.086	0	0.033	0	0	0.022	0.067	0.078	0.061	0.082	0	0.071	0.074	0.073	0.059	0	0.091	0.055	0.153	0.268	0.023	0.072	0.044	0	0.07	0	0	0.058	0	0	0.152	0.032	0	0.073	0.073	0.052	0	0.064
0	0	0	0	0	0	0	0	0	0	0	0	0	0	0	0	0	0	0	0	0	0	0	0	0	0	0	0	0	0	0	0	0	0	0	0	0	0	0	0	0	0	0	0	0	0	0	0	0	0
0.034	0.055	0.028	0.019	0	0.125	0.064	0.037	0.053	0.067	0.057	0.027	0.056	0	0.045	0	0	0.025	0.141	0.071	0.135	0.096	0	0.072	0.091	0.08	0.122	0	0.063	0.041	0.048	0.063	0.02	0.073	0.052	0	0.084	0	0	0.077	0	0	0.058	0.025	0	0.074	0.074	0.118	0	0.053
0.04	0.049	0.031	0.019	0	0.068	0.06	0.025	0.05	0.061	0.052	0.019	0.042	0	0.024	0	0	0.013	0.144	0.061	0.102	0.111	0	0.059	0.071	0.055	0.088	0	0.061	0.029	0.038	0.064	0.013	0.069	0.155	0	0.078	0	0	0.057	0	0	0.052	0.041	0	0.056	0.056	0.151	0	0.04
0	0	0	0	0	0	0	0	0	0	0	0	0	0	0	0	0	0	0	0	0	0	0	0	0	0	0	0	0	0	0	0	0	0	0	0	0	0	0	0	0	0	0	0	0	0	0	0	0	0
0.027	0.042	0.02	0.019	0	0.091	0.052	0.027	0.04	0.058	0.049	0.025	0.041	0	0.034	0	0	0.018	0.14	0.057	0.124	0.063	0	0.061	0.066	0.054	0.093	0	0.053	0.031	0.038	0.039	0.012	0.067	0.042	0	0.063	0	0	0.066	0	0	0.045	0.021	0	0.048	0.048	0.111	0	0.05
0.035	0.055	0.023	0.018	0	0.071	0.062	0.032	0.061	0.056	0.06	0.02	0.059	0	0.029	0	0	0.018	0.104	0.058	0.088	0.194	0	0.059	0.074	0.061	0.089	0	0.064	0.034	0.059	0.075	0.016	0.059	0.054	0	0.074	0	0	0.059	0	0	0.06	0.031	0	0.063	0.063	0.081	0	0.043
0.058	0.119	0.067	0.038	0	0.059	0.112	0.043	0.069	0.518	0.069	0.05	0.071	0	0.067	0	0	0.027	0.078	0.558	0.071	0.075	0	0.104	0.112	0.108	0.065	0	0.073	0.042	0.07	0.086	0.038	0.539	0.036	0	0.133	0	0	0.091	0	0	0.068	0.053	0	0.093	0.093	0.067	0	0.075
0.026	0.07	0.181	0.036	0	0.027	0.073	0.023	0.039	0.058	0.034	0.047	0.038	0	0.052	0	0	0.013	0.025	0.063	0.027	0.025	0	0.043	0.038	0.047	0.022	0	0.032	0.028	0.035	0.037	0.135	0.058	0.012	0	0.051	0	0	0.036	0	0	0.036	0.024	0	0.054	0.054	0.026	0	0.039
0.028	0.06	0.032	0.025	0	0.061	0.062	0.065	0.082	0.074	0.304	0.027	0.261	0	0.04	0	0	0.037	0.068	0.08	0.066	0.073	0	0.074	0.078	0.07	0.06	0	0.189	0.071	0.079	0.109	0.026	0.072	0.034	0	0.08	0	0	0.064	0	0	0.089	0.027	0	0.08	0.08	0.055	0	0.063
0.029	0.054	0.033	0.022	0	0.052	0.052	0.153	0.063	0.059	0.092	0.025	0.098	0	0.034	0	0	0.051	0.06	0.063	0.051	0.057	0	0.069	0.069	0.068	0.057	0	0.102	0.088	0.063	0.086	0.025	0.062	0.028	0	0.068	0	0	0.061	0	0	0.071	0.022	0	0.068	0.068	0.053	0	0.059
0.024	0.058	0.029	0.024	0	0.055	0.056	0.069	0.076	0.074	0.206	0.029	0.187	0	0.038	0	0	0.04	0.058	0.074	0.054	0.061	0	0.068	0.068	0.068	0.048	0	0.169	0.069	0.079	0.094	0.025	0.066	0.026	0	0.067	0	0	0.061	0	0	0.076	0.022	0	0.07	0.07	0.049	0	0.06
0.026	0.057	0.036	0.026	0	0.052	0.06	0.046	0.156	0.069	0.078	0.031	0.083	0	0.045	0	0	0.03	0.06	0.073	0.052	0.06	0	0.071	0.073	0.072	0.058	0	0.08	0.057	0.156	0.178	0.028	0.063	0.029	0	0.072	0	0	0.067	0	0	0.4	0.026	0	0.075	0.075	0.049	0	0.059
0.036	0.056	0.03	0.021	0	0.14	0.067	0.036	0.064	0.075	0.063	0.03	0.063	0	0.043	0	0	0.026	0.171	0.08	0.143	0.106	0	0.092	0.096	0.083	0.141	0	0.071	0.044	0.055	0.072	0.02	0.075	0.059	0	0.095	0	0	0.086	0	0	0.067	0.027	0	0.075	0.075	0.124	0	0.06
0.055	0.102	0.052	0.046	0	0.062	0.108	0.049	0.068	0.163	0.072	0.05	0.079	0	0.071	0	0	0.025	0.084	0.161	0.071	0.066	0	0.123	0.127	0.119	0.078	0	0.072	0.048	0.063	0.082	0.045	0.148	0.035	0	0.138	0	0	0.117	0	0	0.079	0.043	0	0.112	0.112	0.074	0	0.091
0.038	0.085	0.041	0.044	0	0.071	0.094	0.046	0.066	0.117	0.074	0.047	0.076	0	0.066	0	0	0.025	0.086	0.125	0.082	0.063	0	0.144	0.148	0.123	0.08	0	0.079	0.046	0.066	0.071	0.041	0.117	0.029	0	0.125	0	0	0.133	0	0	0.075	0.029	0	0.125	0.125	0.071	0	0.116
0	0	0	0	0	0	0	0	0	0	0	0	0	0	0	0	0	0	0	0	0	0	0	0	0	0	0	0	0	0	0	0	0	0	0	0	0	0	0	0	0	0	0	0	0	0	0	0	0	0
0.042	0.059	0.028	0.019	0	0.127	0.071	0.039	0.055	0.075	0.067	0.032	0.06	0	0.034	0	0	0.024	0.188	0.081	0.168	0.116	0	0.08	0.097	0.079	0.143	0	0.084	0.043	0.056	0.068	0.017	0.081	0.072	0	0.099	0	0	0.085	0	0	0.067	0.028	0	0.072	0.072	0.161	0	0.063
0.056	0.112	0.059	0.05	0	0.062	0.122	0.045	0.062	0.157	0.067	0.064	0.063	0	0.101	0	0	0.024	0.08	0.157	0.07	0.064	0	0.113	0.136	0.12	0.073	0	0.061	0.042	0.059	0.067	0.045	0.154	0.029	0	0.144	0	0	0.109	0	0	0.069	0.042	0	0.111	0.111	0.074	0	0.088
0.027	0.065	0.033	0.037	0	0.053	0.062	0.051	0.054	0.071	0.055	0.045	0.062	0	0.06	0	0	0.021	0.048	0.078	0.044	0.04	0	0.104	0.088	0.092	0.055	0	0.054	0.046	0.053	0.063	0.038	0.069	0.019	0	0.075	0	0	0.098	0	0	0.054	0.019	0	0.096	0.096	0.049	0	0.704
0.044	0.067	0.028	0.029	0	0.066	0.082	0.04	0.061	0.098	0.064	0.039	0.065	0	0.05	0	0	0.019	0.091	0.098	0.082	0.079	0	0.103	0.151	0.124	0.085	0	0.073	0.037	0.057	0.072	0.021	0.102	0.046	0	0.13	0	0	0.117	0	0	0.071	0.032	0	0.104	0.104	0.086	0	0.089
0.031	0.058	0.025	0.024	0	0.117	0.064	0.037	0.054	0.069	0.053	0.03	0.053	0	0.046	0	0	0.027	0.137	0.073	0.138	0.087	0	0.074	0.086	0.079	0.127	0	0.066	0.041	0.052	0.06	0.022	0.07	0.044	0	0.085	0	0	0.082	0	0	0.058	0.023	0	0.074	0.074	0.108	0	0.052
0.057	0.104	0.057	0.048	0	0.067	0.121	0.047	0.069	0.144	0.067	0.062	0.062	0	0.082	0	0	0.021	0.087	0.143	0.076	0.07	0	0.11	0.131	0.114	0.075	0	0.071	0.042	0.06	0.069	0.041	0.145	0.035	0	0.14	0	0	0.117	0	0	0.073	0.042	0	0.103	0.103	0.076	0	0.083
0.058	0.096	0.049	0.048	0	0.062	0.111	0.038	0.072	0.126	0.071	0.054	0.072	0	0.076	0	0	0.03	0.089	0.129	0.088	0.076	0	0.129	0.158	0.118	0.079	0	0.078	0.046	0.06	0.073	0.042	0.129	0.04	0	0.163	0	0	0.123	0	0	0.073	0.045	0	0.114	0.114	0.086	0	0.098
0.065	0.696	0.069	0.044	0	0.049	0.139	0.033	0.054	0.108	0.051	0.054	0.057	0	0.19	0	0	0.02	0.057	0.11	0.048	0.058	0	0.086	0.088	0.068	0.054	0	0.052	0.036	0.054	0.061	0.045	0.12	0.026	0	0.108	0	0	0.077	0	0	0.055	0.055	0	0.074	0.074	0.05	0	0.067
0.021	0.046	0.025	0.02	0	0.054	0.05	0.072	0.067	0.058	0.108	0.033	0.107	0	0.038	0	0	0.057	0.062	0.064	0.051	0.052	0	0.071	0.069	0.063	0.061	0	0.115	0.1	0.06	0.073	0.021	0.055	0.023	0	0.06	0	0	0.06	0	0	0.063	0.017	0	0.065	0.065	0.053	0	0.064
0.026	0.047	0.031	0.023	0	0.046	0.051	0.063	0.069	0.062	0.097	0.024	0.101	0	0.035	0	0	0.061	0.054	0.067	0.05	0.057	0	0.061	0.063	0.058	0.052	0	0.098	0.111	0.06	0.085	0.025	0.059	0.028	0	0.063	0	0	0.051	0	0	0.063	0.025	0	0.061	0.061	0.048	0	0.052
0.028	0.048	0.024	0.024	0	0.053	0.046	0.159	0.062	0.057	0.095	0.031	0.096	0	0.038	0	0	0.054	0.055	0.059	0.05	0.053	0	0.064	0.062	0.052	0.06	0	0.102	0.083	0.063	0.068	0.028	0.055	0.025	0	0.063	0	0	0.055	0	0	0.07	0.021	0	0.074	0.074	0.054	0	0.059
0.033	0.236	0.04	0.07	0	0.045	0.083	0.024	0.047	0.078	0.038	0.063	0.044	0	0.698	0	0	0.024	0.045	0.085	0.047	0.03	0	0.083	0.071	0.064	0.039	0	0.035	0.032	0.035	0.035	0.066	0.072	0.011	0	0.077	0	0	0.072	0	0	0.044	0.02	0	0.07	0.07	0.04	0	0.059
0.041	0.085	0.039	0.031	0	0.07	0.092	0.043	0.07	0.102	0.073	0.044	0.071	0	0.054	0	0	0.028	0.085	0.105	0.072	0.075	0	0.127	0.145	0.129	0.074	0	0.082	0.044	0.07	0.088	0.028	0.107	0.036	0	0.118	0	0	0.127	0	0	0.074	0.032	0	0.127	0.127	0.069	0	0.114
0.028	0.051	0.029	0.021	0	0.049	0.048	0.165	0.072	0.062	0.101	0.024	0.112	0	0.039	0	0	0.05	0.057	0.066	0.057	0.06	0	0.07	0.066	0.064	0.055	0	0.108	0.089	0.071	0.086	0.024	0.062	0.025	0	0.07	0	0	0.058	0	0	0.074	0.021	0	0.072	0.072	0.05	0	0.058
0.026	0.052	0.025	0.019	0	0.064	0.051	0.081	0.071	0.056	0.113	0.028	0.115	0	0.042	0	0	0.051	0.07	0.063	0.06	0.06	0	0.074	0.074	0.067	0.061	0	0.125	0.092	0.066	0.076	0.028	0.056	0.029	0	0.064	0	0	0.069	0	0	0.075	0.02	0	0.077	0.077	0.058	0	0.072
0	0	0	0	0	0	0	0	0	0	0	0	0	0	0	0	0	0	0	0	0	0	0	0	0	0	0	0	0	0	0	0	0	0	0	0	0	0	0	0	0	0	0	0	0	0	0	0	0	0
0.033	0.051	0.023	0.022	0	0.112	0.059	0.031	0.055	0.07	0.055	0.034	0.052	0	0.038	0	0	0.025	0.172	0.076	0.155	0.093	0	0.071	0.084	0.082	0.13	0	0.061	0.038	0.051	0.058	0.021	0.077	0.055	0	0.088	0	0	0.076	0	0	0.058	0.024	0	0.064	0.064	0.143	0	0.053
0.03	0.049	0.027	0.022	0	0.055	0.058	0.06	0.07	0.066	0.149	0.031	0.132	0	0.036	0	0	0.039	0.068	0.07	0.065	0.066	0	0.075	0.09	0.077	0.063	0	0.259	0.064	0.057	0.081	0.024	0.067	0.035	0	0.078	0	0	0.071	0	0	0.073	0.024	0	0.074	0.074	0.068	0	0.06
0.062	0.718	0.072	0.048	0	0.051	0.147	0.034	0.055	0.113	0.053	0.055	0.057	0	0.196	0	0	0.022	0.06	0.114	0.052	0.057	0	0.087	0.092	0.073	0.058	0	0.053	0.037	0.056	0.064	0.048	0.126	0.028	0	0.111	0	0	0.08	0	0	0.057	0.052	0	0.078	0.078	0.051	0	0.07
0.057	0.102	0.053	0.054	0	0.062	0.108	0.043	0.066	0.146	0.064	0.051	0.067	0	0.09	0	0	0.025	0.073	0.149	0.069	0.06	0	0.123	0.132	0.119	0.071	0	0.071	0.043	0.061	0.074	0.048	0.139	0.031	0	0.151	0	0	0.121	0	0	0.066	0.039	0	0.118	0.118	0.066	0	0.093
0.03	0.052	0.033	0.016	0	0.043	0.055	0.049	0.061	0.061	0.087	0.017	0.083	0	0.024	0	0	0.037	0.059	0.065	0.047	0.073	0	0.056	0.065	0.055	0.051	0	0.091	0.078	0.058	0.089	0.017	0.066	0.055	0	0.071	0	0	0.051	0	0	0.06	0.035	0	0.06	0.06	0.051	0	0.05
0.031	0.051	0.036	0.016	0	0.043	0.055	0.048	0.068	0.065	0.097	0.016	0.083	0	0.025	0	0	0.04	0.058	0.066	0.045	0.073	0	0.053	0.061	0.055	0.051	0	0.096	0.083	0.056	0.096	0.015	0.067	0.053	0	0.067	0	0	0.048	0	0	0.061	0.035	0	0.058	0.058	0.052	0	0.048
0.045	0.054	0.023	0.026	0	0.125	0.069	0.034	0.052	0.069	0.058	0.03	0.054	0	0.043	0	0	0.023	0.193	0.072	0.176	0.093	0	0.082	0.096	0.074	0.138	0	0.068	0.043	0.049	0.058	0.017	0.075	0.066	0	0.084	0	0	0.077	0	0	0.059	0.03	0	0.07	0.07	0.179	0	0.062
0.038	0.059	0.028	0.025	0	0.117	0.069	0.034	0.048	0.071	0.059	0.036	0.057	0	0.039	0	0	0.026	0.176	0.075	0.155	0.1	0	0.083	0.089	0.075	0.127	0	0.071	0.039	0.045	0.05	0.016	0.079	0.063	0	0.086	0	0	0.091	0	0	0.057	0.025	0	0.064	0.064	0.188	0	0.065
0.036	0.049	0.025	0.022	0	0.104	0.061	0.032	0.045	0.063	0.053	0.034	0.048	0	0.04	0	0	0.018	0.136	0.063	0.123	0.076	0	0.066	0.079	0.065	0.111	0	0.062	0.037	0.042	0.049	0.017	0.062	0.049	0	0.075	0	0	0.069	0	0	0.053	0.023	0	0.06	0.06	0.119	0	0.048
0.048	0.079	0.047	0.044	0	0.052	0.08	0.035	0.06	0.407	0.056	0.045	0.061	0	0.125	0	0	0.023	0.064	0.552	0.073	0.048	0	0.099	0.097	0.108	0.055	0	0.064	0.036	0.055	0.062	0.05	0.351	0.023	0	0.122	0	0	0.084	0	0	0.064	0.033	0	0.1	0.1	0.063	0	0.062
0.037	0.05	0.021	0.028	0	0.084	0.06	0.033	0.042	0.056	0.047	0.027	0.038	0	0.03	0	0	0.018	0.147	0.055	0.12	0.076	0	0.062	0.066	0.052	0.094	0	0.05	0.031	0.036	0.04	0.013	0.064	0.053	0	0.069	0	0	0.061	0	0	0.047	0.024	0	0.048	0.048	0.118	0	0.043
0.038	0.054	0.028	0.023	0	0.118	0.071	0.031	0.062	0.076	0.061	0.031	0.051	0	0.039	0	0	0.023	0.21	0.077	0.159	0.116	0	0.084	0.088	0.076	0.143	0	0.069	0.036	0.054	0.066	0.016	0.078	0.078	0	0.096	0	0	0.081	0	0	0.063	0.028	0	0.066	0.066	0.164	0	0.059
0	0	0	0	0	0	0	0	0	0	0	0	0	0	0	0	0	0	0	0	0	0	0	0	0	0	0	0	0	0	0	0	0	0	0	0	0	0	0	0	0	0	0	0	0	0	0	0	0	0
0.042	0.063	0.029	0.028	0	0.064	0.077	0.037	0.061	0.091	0.065	0.033	0.058	0	0.049	0	0	0.023	0.097	0.092	0.083	0.079	0	0.107	0.142	0.122	0.082	0	0.081	0.041	0.058	0.078	0.021	0.096	0.05	0	0.118	0	0	0.119	0	0	0.063	0.032	0	0.098	0.098	0.088	0	0.086
0.039	0.056	0.026	0.022	0	0.132	0.069	0.032	0.059	0.081	0.063	0.039	0.052	0	0.041	0	0	0.024	0.193	0.079	0.157	0.103	0	0.083	0.097	0.082	0.145	0	0.078	0.036	0.05	0.064	0.017	0.08	0.066	0	0.096	0	0	0.089	0	0	0.06	0.027	0	0.079	0.079	0.154	0	0.062
0.039	0.053	0.024	0.023	0	0.124	0.069	0.029	0.051	0.08	0.065	0.029	0.058	0	0.038	0	0	0.025	0.195	0.08	0.169	0.098	0	0.081	0.095	0.078	0.135	0	0.074	0.039	0.055	0.057	0.019	0.082	0.06	0	0.089	0	0	0.086	0	0	0.062	0.028	0	0.07	0.07	0.166	0	0.065
0.025	0.046	0.03	0.024	0	0.042	0.051	0.057	0.055	0.057	0.091	0.017	0.084	0	0.031	0	0	0.046	0.05	0.061	0.046	0.053	0	0.055	0.06	0.053	0.048	0	0.088	0.103	0.048	0.072	0.022	0.056	0.032	0	0.058	0	0	0.051	0	0	0.063	0.025	0	0.053	0.053	0.047	0	0.049
0.006	0.01	0.006	0.015	0	0.019	0.014	0.023	0.012	0.013	0.02	0.02	0.023	0	0.014	0	0	0.093	0.014	0.013	0.019	0.008	0	0.015	0.014	0.015	0.017	0	0.019	0.061	0.012	0.01	0.015	0.012	0.002	0	0.013	0	0	0.014	0	0	0.019	0.003	0	0.016	0.016	0.009	0	0.013
0	0	0	0	0	0	0	0	0	0	0	0	0	0	0	0	0	0	0	0	0	0	0	0	0	0	0	0	0	0	0	0	0	0	0	0	0	0	0	0	0	0	0	0	0	0	0	0	0	0
0.031	0.049	0.019	0.031	0	0.058	0.055	0.036	0.047	0.068	0.048	0.032	0.041	0	0.052	0	0	0.025	0.072	0.074	0.068	0.051	0	0.087	0.105	0.099	0.059	0	0.051	0.034	0.045	0.052	0.021	0.07	0.025	0	0.088	0	0	0.099	0	0	0.044	0.019	0	0.081	0.081	0.064	0	0.073
0.056	0.092	0.04	0.042	0	0.069	0.102	0.046	0.072	0.13	0.073	0.054	0.07	0	0.071	0	0	0.028	0.101	0.132	0.085	0.078	0	0.145	0.165	0.144	0.086	0	0.083	0.05	0.065	0.084	0.033	0.13	0.04	0	0.147	0	0	0.144	0	0	0.084	0.04	0	0.128	0.128	0.084	0	0.101
0.063	0.117	0.065	0.042	0	0.06	0.111	0.044	0.07	0.578	0.066	0.053	0.07	0	0.076	0	0	0.023	0.075	0.684	0.075	0.07	0	0.11	0.114	0.114	0.069	0	0.074	0.042	0.067	0.079	0.039	0.571	0.035	0	0.14	0	0	0.099	0	0	0.071	0.051	0	0.1	0.1	0.069	0	0.082
0.035	0.068	0.035	0.035	0	0.056	0.081	0.042	0.062	0.103	0.071	0.037	0.078	0	0.058	0	0	0.023	0.077	0.108	0.069	0.069	0	0.128	0.132	0.126	0.075	0	0.078	0.04	0.061	0.077	0.023	0.098	0.036	0	0.116	0	0	0.12	0	0	0.075	0.026	0	0.118	0.118	0.064	0	0.101
0.064	0.104	0.044	0.048	0	0.064	0.105	0.041	0.062	0.145	0.063	0.052	0.062	0	0.076	0	0	0.021	0.081	0.154	0.07	0.067	0	0.124	0.138	0.114	0.077	0	0.07	0.043	0.06	0.068	0.032	0.149	0.033	0	0.14	0	0	0.116	0	0	0.068	0.043	0	0.103	0.103	0.074	0	0.081
0	0	0	0	0	0	0	0	0	0	0	0	0	0	0	0	0	0	0	0	0	0	0	0	0	0	0	0	0	0	0	0	0	0	0	0	0	0	0	0	0	0	0	0	0	0	0	0	0	0
0.061	0.619	0.069	0.047	0	0.051	0.14	0.035	0.056	0.109	0.054	0.054	0.055	0	0.209	0	0	0.02	0.061	0.109	0.05	0.058	0	0.087	0.092	0.072	0.054	0	0.053	0.037	0.05	0.059	0.045	0.121	0.028	0	0.109	0	0	0.078	0	0	0.056	0.052	0	0.075	0.075	0.051	0	0.069
0.035	0.072	0.033	0.037	0	0.06	0.085	0.042	0.06	0.095	0.071	0.045	0.071	0	0.053	0	0	0.025	0.072	0.102	0.074	0.064	0	0.117	0.138	0.126	0.07	0	0.078	0.043	0.058	0.073	0.027	0.093	0.033	0	0.118	0	0	0.118	0	0	0.077	0.027	0	0.113	0.113	0.065	0	0.105
0.063	0.114	0.063	0.043	0	0.058	0.11	0.046	0.072	0.594	0.065	0.051	0.069	0	0.078	0	0	0.023	0.075	0.705	0.075	0.068	0	0.112	0.115	0.116	0.07	0	0.073	0.041	0.068	0.081	0.041	0.573	0.034	0	0.144	0	0	0.101	0	0	0.07	0.051	0	0.101	0.101	0.068	0	0.082
0	0	0	0	0	0	0	0	0	0	0	0	0	0	0	0	0	0	0	0	0	0	0	0	0	0	0	0	0	0	0	0	0	0	0	0	0	0	0	0	0	0	0	0	0	0	0	0	0	0
0.026	0.04	0.022	0.024	0	0.105	0.053	0.03	0.049	0.052	0.045	0.024	0.044	0	0.041	0	0	0.022	0.117	0.056	0.113	0.065	0	0.067	0.071	0.059	0.1	0	0.056	0.039	0.04	0.048	0.018	0.051	0.035	0	0.071	0	0	0.068	0	0	0.046	0.018	0	0.057	0.057	0.097	0	0.046
0	0	0	0	0	0	0	0	0	0	0	0	0	0	0	0	0	0	0	0	0	0	0	0	0	0	0	0	0	0	0	0	0	0	0	0	0	0	0	0	0	0	0	0	0	0	0	0	0	0
0.029	0.054	0.033	0.021	0	0.054	0.054	0.045	0.249	0.073	0.08	0.028	0.091	0	0.046	0	0	0.029	0.061	0.08	0.056	0.059	0	0.068	0.076	0.071	0.06	0	0.086	0.056	0.143	0.199	0.024	0.069	0.027	0	0.064	0	0	0.056	0	0	0.173	0.026	0	0.071	0.071	0.048	0	0.063
0.03	0.057	0.036	0.021	0	0.055	0.059	0.045	0.28	0.077	0.082	0.023	0.09	0	0.042	0	0	0.021	0.068	0.082	0.058	0.079	0	0.069	0.073	0.074	0.06	0	0.089	0.051	0.157	0.252	0.026	0.074	0.037	0	0.074	0	0	0.058	0	0	0.169	0.032	0	0.074	0.074	0.053	0	0.064
0.013	0.034	0.014	0.027	0	0.05	0.039	0.037	0.038	0.039	0.044	0.025	0.047	0	0.039	0	0	0.036	0.034	0.043	0.038	0.024	0	0.062	0.046	0.04	0.032	0	0.043	0.041	0.044	0.036	0.031	0.036	0.009	0	0.041	0	0	0.053	0	0	0.045	0.009	0	0.047	0.047	0.028	0	0.065
0.033	0.054	0.032	0.014	0	0.078	0.062	0.034	0.061	0.06	0.066	0.018	0.058	0	0.028	0	0	0.018	0.102	0.066	0.086	0.235	0	0.065	0.076	0.063	0.088	0	0.072	0.037	0.057	0.079	0.018	0.066	0.066	0	0.081	0	0	0.06	0	0	0.06	0.033	0	0.069	0.069	0.088	0	0.045
0.029	0.062	0.029	0.023	0	0.059	0.06	0.065	0.074	0.073	0.29	0.03	0.246	0	0.038	0	0	0.037	0.067	0.076	0.069	0.063	0	0.075	0.078	0.065	0.059	0	0.172	0.066	0.069	0.091	0.024	0.071	0.031	0	0.08	0	0	0.067	0	0	0.074	0.024	0	0.072	0.072	0.065	0	0.066
0	0	0	0	0	0	0	0	0	0	0	0	0	0	0	0	0	0	0	0	0	0	0	0	0	0	0	0	0	0	0	0	0	0	0	0	0	0	0	0	0	0	0	0	0	0	0	0	0	0
0.049	0.085	0.042	0.043	0	0.071	0.099	0.044	0.062	0.125	0.066	0.053	0.066	0	0.066	0	0	0.026	0.085	0.13	0.079	0.069	0	0.136	0.159	0.135	0.078	0	0.078	0.05	0.059	0.077	0.03	0.123	0.036	0	0.134	0	0	0.13	0	0	0.068	0.037	0	0.119	0.119	0.081	0	0.105
0.064	0.104	0.051	0.048	0	0.067	0.116	0.042	0.068	0.158	0.069	0.047	0.07	0	0.072	0	0	0.026	0.091	0.165	0.086	0.08	0	0.123	0.142	0.129	0.086	0	0.076	0.044	0.062	0.079	0.035	0.16	0.042	0	0.15	0	0	0.116	0	0	0.071	0.048	0	0.12	0.12	0.085	0	0.089
0.044	0.455	0.046	0.034	0	0.035	0.091	0.03	0.03	0.073	0.035	0.045	0.037	0	0.022	0	0	0.02	0.037	0.07	0.032	0.039	0	0.049	0.053	0.04	0.041	0	0.036	0.03	0.04	0.035	0.022	0.081	0.017	0	0.061	0	0	0.05	0	0	0.034	0.035	0	0.039	0.039	0.033	0	0.047
0.04	0.052	0.028	0.018	0	0.07	0.066	0.032	0.057	0.064	0.066	0.022	0.052	0	0.029	0	0	0.019	0.11	0.067	0.084	0.332	0	0.061	0.082	0.063	0.089	0	0.069	0.036	0.052	0.08	0.015	0.07	0.074	0	0.084	0	0	0.065	0	0	0.06	0.034	0	0.062	0.062	0.094	0	0.049
0.037	0.052	0.023	0.019	0	0.138	0.064	0.04	0.059	0.075	0.06	0.036	0.055	0	0.045	0	0	0.025	0.159	0.075	0.14	0.094	0	0.08	0.084	0.073	0.126	0	0.071	0.043	0.055	0.066	0.02	0.076	0.055	0	0.081	0	0	0.075	0	0	0.069	0.024	0	0.071	0.071	0.137	0	0.062
0.016	0.021	0.01	0.022	0	0.025	0.021	0.025	0.025	0.029	0.019	0.029	0.023	0	0.023	0	0	0.011	0.035	0.03	0.041	0.072	0	0.023	0.026	0.024	0.03	0	0.021	0.023	0.019	0.016	0.019	0.03	0.011	0	0.029	0	0	0.027	0	0	0.023	0.008	0	0.022	0.022	0.033	0	0.028
0.029	0.048	0.023	0.022	0	0.054	0.058	0.062	0.072	0.067	0.165	0.027	0.144	0	0.037	0	0	0.035	0.061	0.068	0.065	0.062	0	0.077	0.083	0.075	0.058	0	0.287	0.065	0.057	0.082	0.023	0.062	0.034	0	0.082	0	0	0.069	0	0	0.065	0.022	0	0.07	0.07	0.066	0	0.057
[truncated: 123 more columns]
